# Supplementary material for: Study of promoted Cu/ZnO and Cu/ZrO2 catalysts for dimethyl adipate hydrogenolysis
Source: Royal Society of Chemistry journal article supplement (doi:10.1039/d4cy00686k), 2024-01-01
Supplement: d4cy00686k1.pdf [file d4cy00686k1.pdf]

## Study of promoted Cu/ZnO and Cu/ZrO<sub>2</sub> catalysts for dimethyl adipate hydrogenolysis

Jaroslav Aubrecht<sup>1\*</sup>, Violetta Pospelova<sup>1</sup>, Sharmistha Saha<sup>1</sup>, Miloslav Lhotka<sup>2</sup>, Iva Paterová<sup>3</sup>, David Kubička<sup>1</sup>

<sup>1</sup> Department of Sustainable Fuels and Green Chemistry, University of Chemistry and Technology Prague, Technická 5, 166 28 Prague, Czech Republic

<sup>2</sup> Department of Inorganic Technology, University of Chemistry and Technology Prague, Technická 5, 166 28 Prague, Czech Republic

<sup>3</sup> Department of Organic Technology, University of Chemistry and Technology Prague, Technická 5, 166 28 Prague, Czech Republic

\*Corresponding author: Jaroslav Aubrecht, aubrechj@vscht.cz, +420 220 443 811

### Evaluation of the support effect in XRF analysis

To evaluate the effect of ZrO<sub>2</sub> and ZnO during the XRF, the physical mixtures of 10% CuO and 90% of ZrO<sub>2</sub> or ZnO were prepared from the standard chemicals. When the sample was 3-times measured the average composition was estimated (Table SI1). From this there is a clear observation that CuO content is overestimated.

Table SI1.: Average composition of physical mixtures.

|                                   | Average composition, CuO | Average composition, support |
|-----------------------------------|--------------------------|------------------------------|
| 10% CuO and 90 % ZnO              | 10.3 %                   | 89.7 %                       |
| 10% CuO and 90 % ZrO <sub>2</sub> | 11.0 %                   | 89.0%                        |

|                           | 1st peak | 2nd peak |
|---------------------------|----------|----------|
| Cu/ZrO <sub>2</sub> _DP   | 38%      | 62%      |
| CuZn/ZrO <sub>2</sub> _DP | 23%      | 77%      |
| CuNi/ZrO <sub>2</sub> _DP | 53%      | 47%      |
| CuCo/ZrO <sub>2</sub> _DP | 40%      | 60%      |

Table SI2.: Ratio of deconvoluted peaks for ZrO<sub>2</sub>-based catalysts.

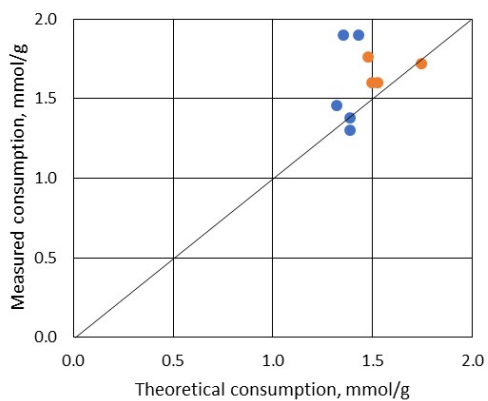

Figure S11.: Comparison of theoretical and measured hydrogen consumption during TPR-H<sub>2</sub>.

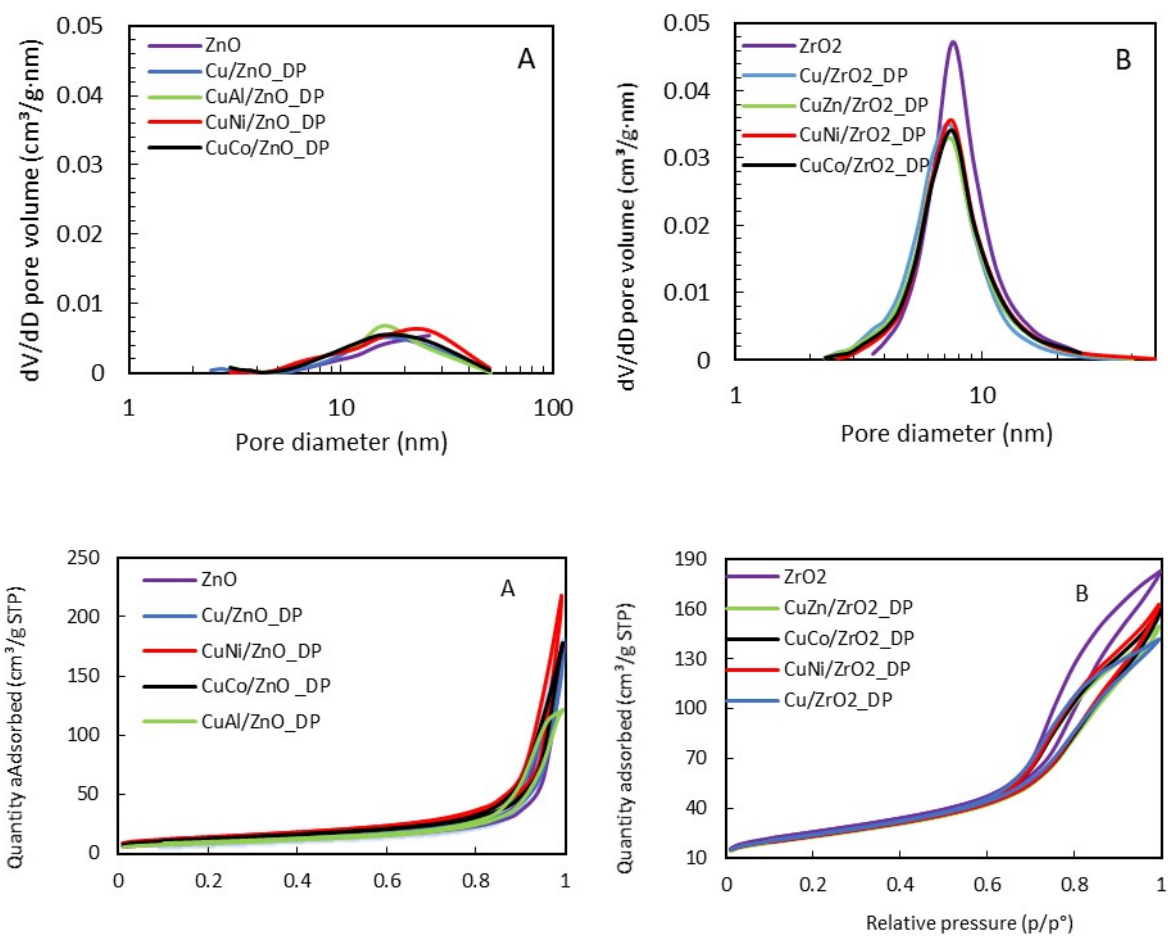

Figure S12.: Pore size distribution and adsorption-desorption hysteresis of (A) ZnO-supported and (B) ZrO<sub>2</sub>-supported catalysts.

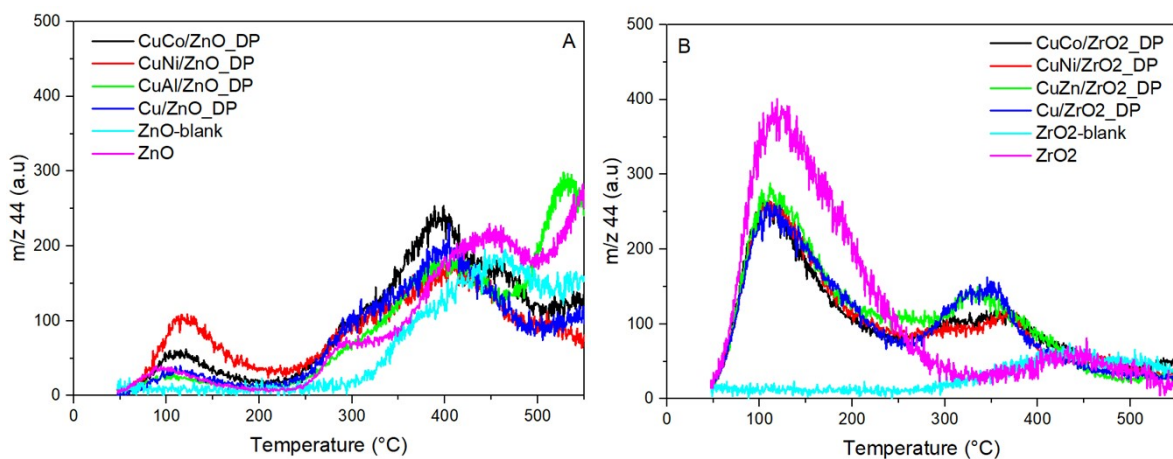

Figure S13.: TPD-CO<sub>2</sub> of (A) ZnO-based catalysts and (B) ZrO<sub>2</sub>-based catalysts.

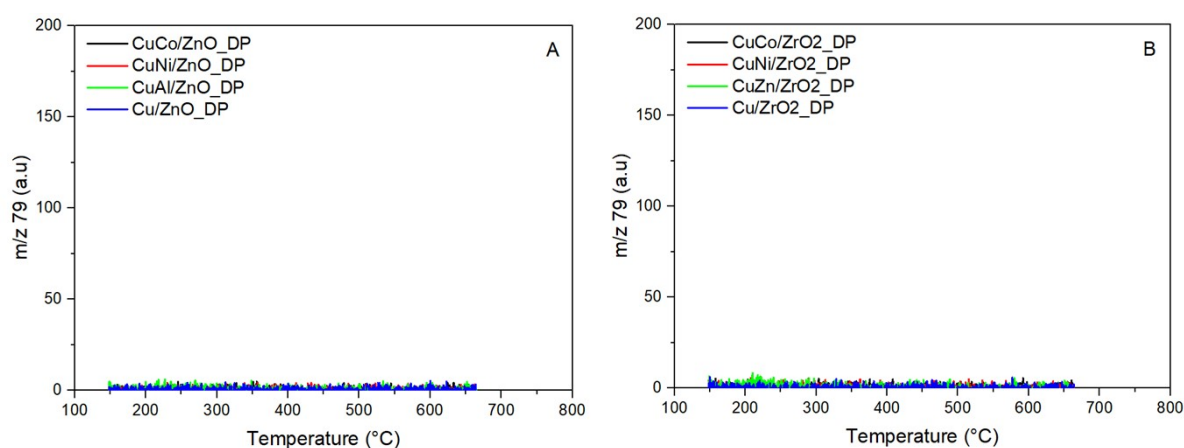

Figure S14.: TPD-pyr of (A) ZnO-based catalysts and (B) ZrO<sub>2</sub>-based catalysts.

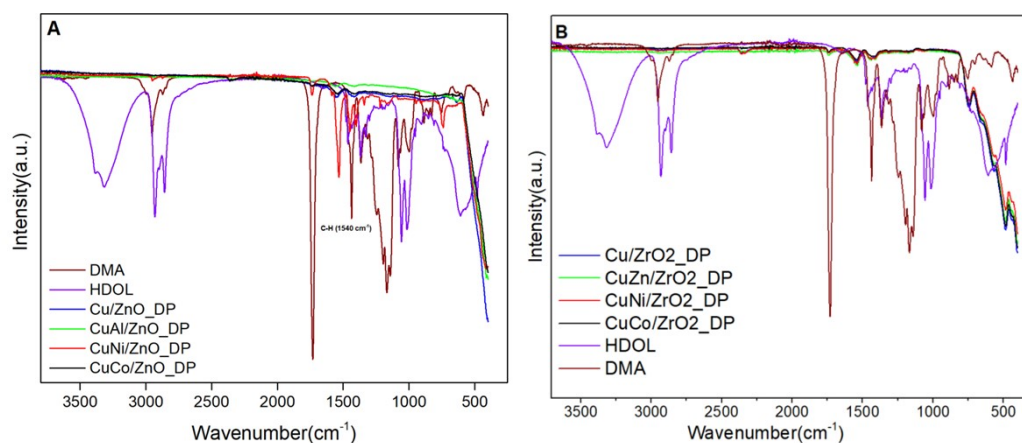

Figure S15.: FTIR spectra of the spent catalysts and pure HDOL and DMA compounds.

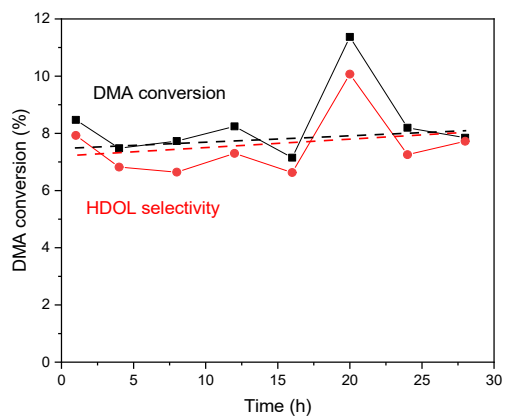

Figure S16.: The stability test results (DMA conversion and HDOL selectivity) for Cu/ZrO<sub>2</sub>\_DP catalyst for 28 h at 220°C and 100 bar.

Table S13.: The change in DMA conversion after 8h of experiment; T=220°C, p=100 bar

| Sample name               | DMA conversion (%) at t = 0h | DMA conversion (%) at t = 8h |
|---------------------------|------------------------------|------------------------------|
| Cu/ZrO <sub>2</sub> _DP   | 9                            | 9                            |
| CuZn/ZrO <sub>2</sub> _DP | 7                            | 8                            |
| CuNi/ZrO <sub>2</sub> _DP | 12                           | 10                           |
| CuCo/ZrO <sub>2</sub> _DP | 15                           | 15                           |
| Cu/ZnO_DP                 | 51                           | 49                           |
| CuAl/ZnO_DP               | 23                           | 21                           |
| CuNi/ZnO_DP               | 6                            | 5                            |
